# Supplementary figures and images for: Epithelial-to-mesenchymal transition is not required for lung metastasis but contributes to chemoresistance
Source: Springer Nature journal article supplement (doi:10.1038/nature15748), 2015-11-10

## Figure 2d

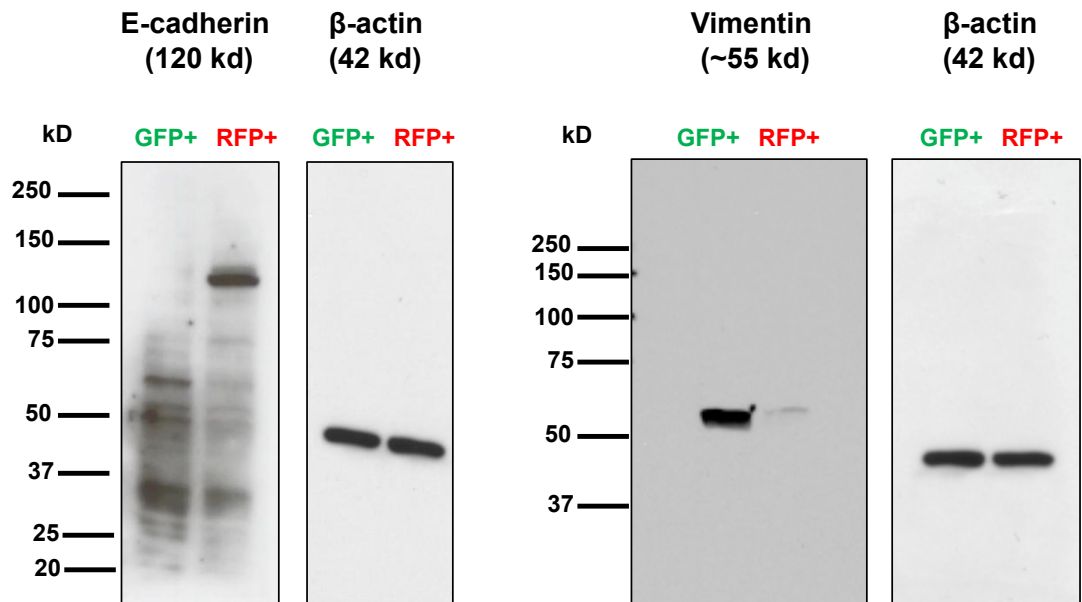

Supplement: 41586_2015_BFnature15748_MOESM297_ESM.pdf [file 41586_2015_BFnature15748_MOESM297_ESM.pdf]
